# Supplementary material for: Large-scale monitoring of effects of clothianidin dressed oilseed rape seeds on pollinating insects in Northern Germany: implementation of the monitoring project and its representativeness
Source: PubMed Central journal article supplement (PMC5093193; doi:10.1007/s10646-016-1724-9), 2016-09-27
Supplement: 10646_2016_1724_MOESM1_ESM.pdf [file 10646_2016_1724_MOESM1_ESM.pdf]

## Electronic Supplementary Material

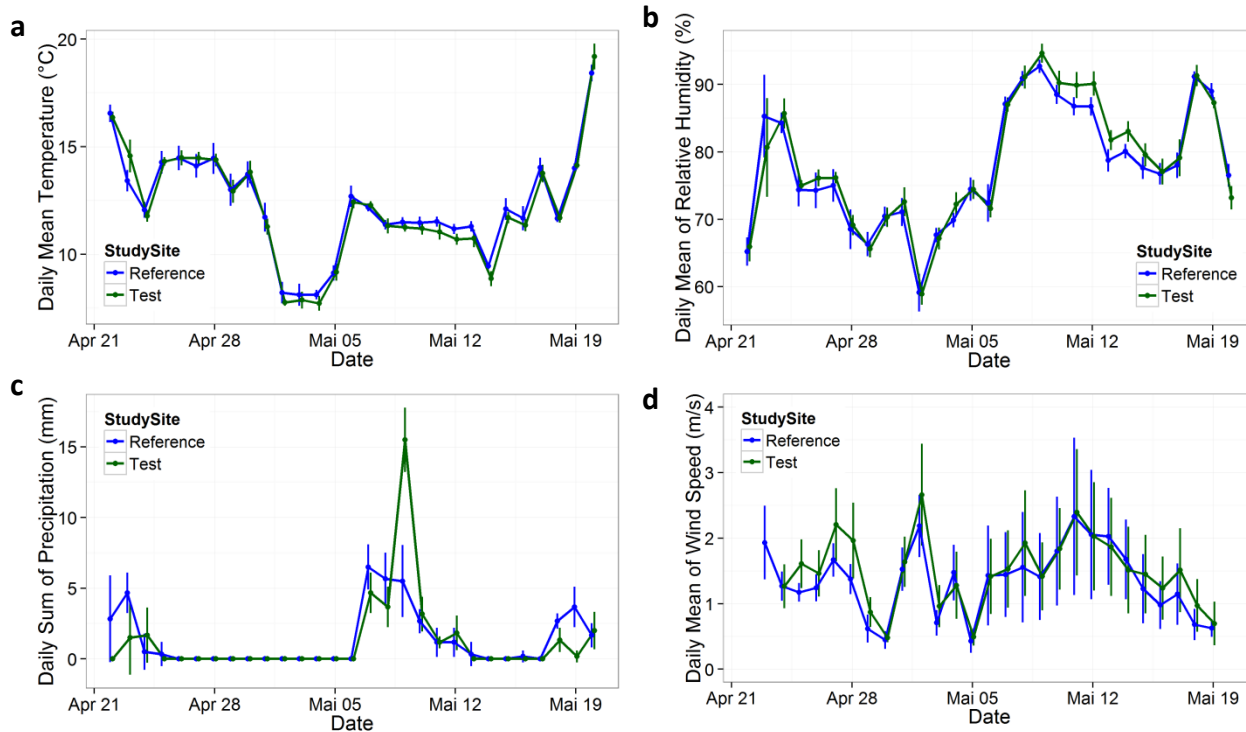

Figure S 1 Weather conditions at the honey bee study locations during the exposure phase. Daily means of temperature (a), relative humidity (b), and wind speed (d), and the daily sum of precipitation (c) averaged per study site. Error bars indicate the 95 % confidence intervals per study site and day and are slightly offset to avoid overlapping.

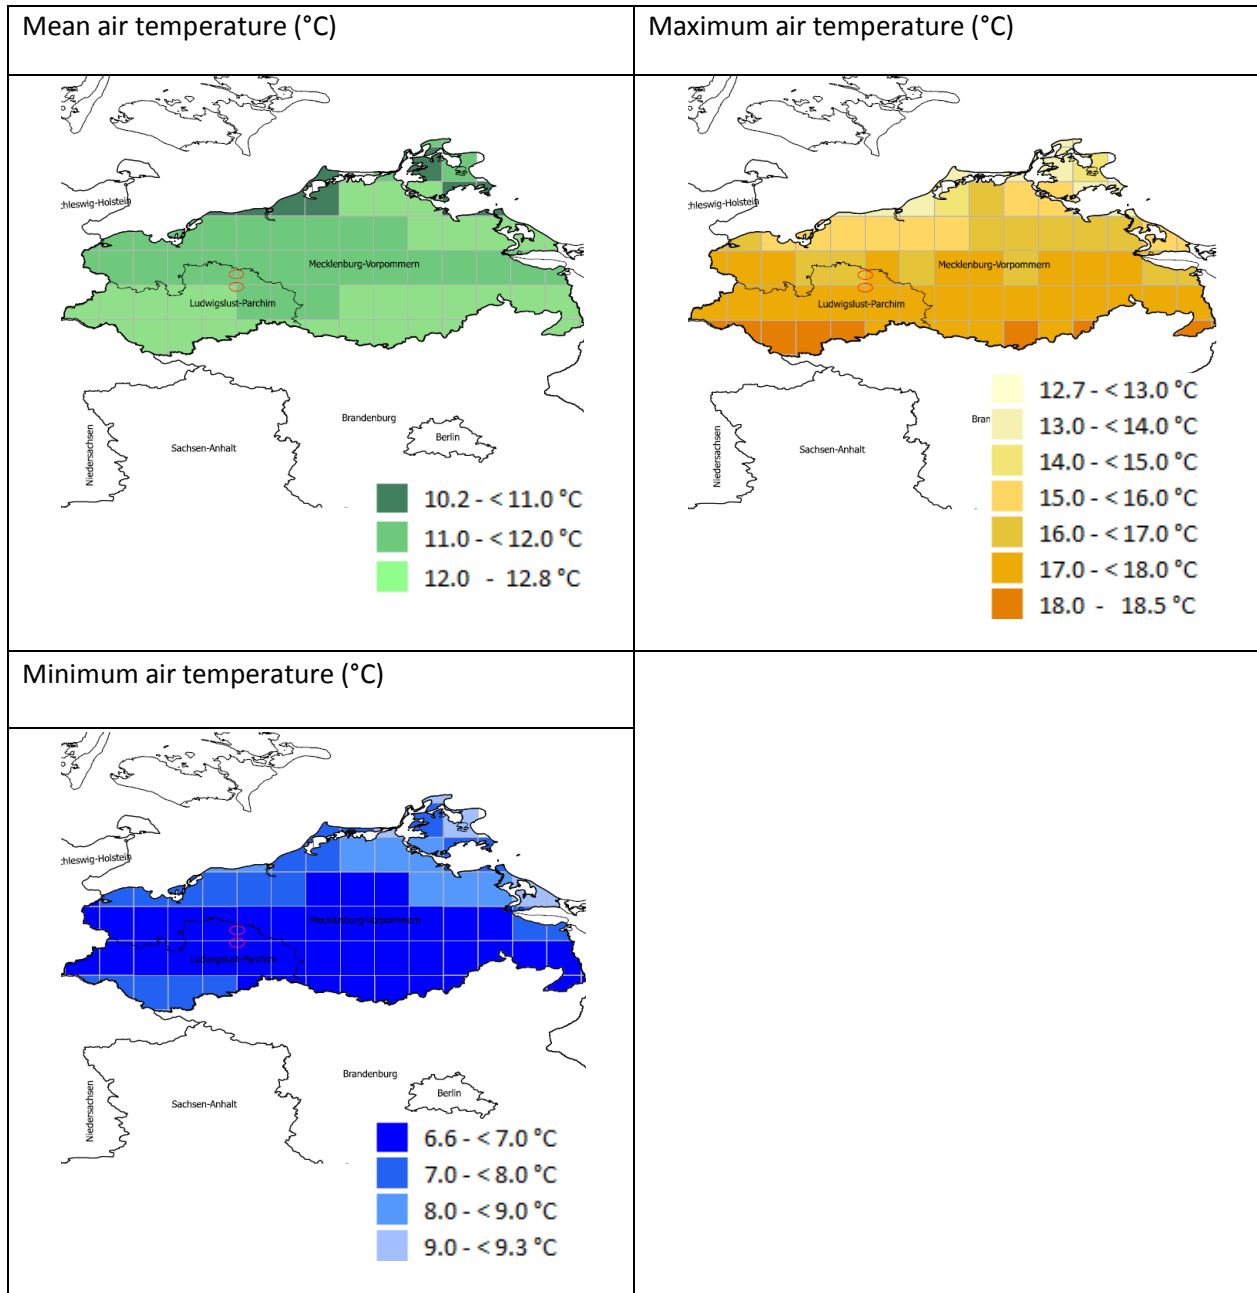

Figure S 2 Long-term average (2000-2013) mean, maximum, and minimum air temperature (°C) during the 30 days flowering period of winter oilseed rape in the study area (red circles), the district of Ludwigslust-Parchim and the federal state Mecklenburg-West Pomerania.

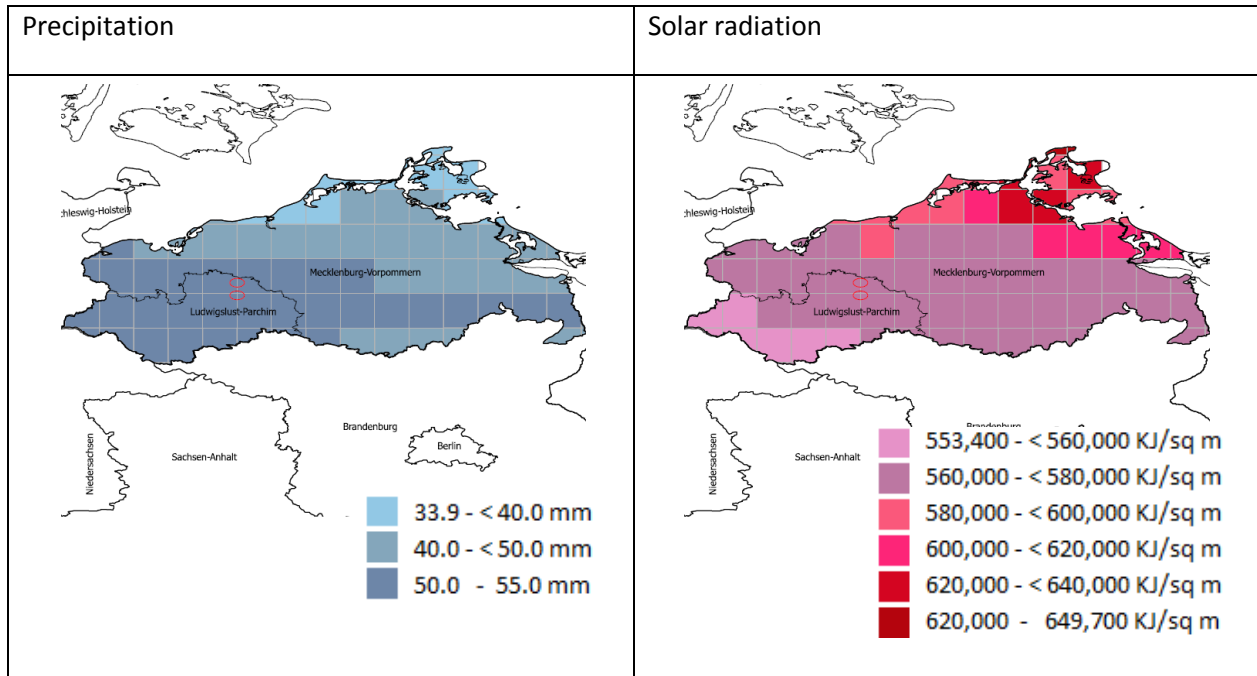

Figure S 3 Long-term average (2000-2013) precipitation (mm) and solar radiation (KJ/m<sup>2</sup>) during the 30 days flowering period of winter oilseed rape in the study area (red circles), the district of Ludwigslust-Parchim and the federal state Mecklenburg-West Pomerania.

Table S 1 Characterisation of OSR seeds. The flowering time is coded as follows 2: early, 3: intermediate, 4: late. For study fields outside the core area some information was not available and is indicated by *a*. *b* indicates that the clothianidin loading of seeds was not analysed. *c* The varieties at the demonstration field T13 which were also drilled to the study field T10, are not allowed to carry a batch number. *d* Note that the varieties *Anisse* and *ES Alegrie* of study field T13 were not dressed with clothianidin but the dressing contained thiamethoxam. The value indicated refers in these two cases to the respective loading with thiamethoxam in mg/kg seeds.

| Study Site | Study Field | OSR Variety | Seed manufacturer | Batch number    | Sowing Date | Flowering Time | Plot Size (ha) | TSW (g) | Amount Sowed (kg) | Seed Density (kg/ha) | Clothianidin Loading (mg/kg seed) |
|------------|-------------|-------------|-------------------|-----------------|-------------|----------------|----------------|---------|-------------------|----------------------|-----------------------------------|
| Reference  | R1          | Sherpa      | Rapool            | DE 013-1471447  | 21.08.2013  | 3              | 16.9           | 8.5     | 64.9              | 3.8                  | 113                               |
|            | R2          | Sherpa      | Rapool            | DE 013-1471447  | 19.08.2013  | 3              | 26.7           | 8.5     | 99.2              | 3.7                  | 126                               |
|            | R3          | Genie       | Rapool            | DE 053-323088   | 13.08.2013  | 3              | 34.0           | 7       | 102.3             | 3.0                  | 19                                |
|            | R4          | Genie       | Rapool            | DE 053-323088   | 14.08.2013  | 3              | 33.5           | 7       | 90.4              | 2.7                  | 24                                |
|            | R5          | Sherpa      | Rapool            | DE 013-1471447  | 19.08.2013  | 3              | 21.8           | 8.5     | 83.9              | 3.9                  | 190                               |
|            | R6          | Avatar      | Rapool            | DE 013-1471584  | 15.08.2013  | 2              | 10.8           | 6.8     | 34.4              | 3.2                  | 226                               |
|            | R7          | Andromeda   | LG                | DE 063-1723110  | 21.08.2013  | 2              | 97.3           | 5.5     | 167.3             | 1.7                  | 24                                |
|            | R8          | Genie       | Rapool            | DE 053-323088   | 17.08.2013  | 3              | 10.3           | 7       | 27.9              | 2.7                  | 13                                |
|            | R9          | Sherpa      | Rapool            | DE 013-1471447  | 22.08.2013  | 3              | 36.9           | 8.5     | 153.6             | 4.2                  | 97                                |
|            | R10         | Genie       | Rapool            | DE 053-323088   | 18.08.2013  | 3              | 67.7           | 7       | 168.6             | 2.5                  | 15                                |
|            | R11         | Compass     | Rapool            | DE 053-323022   | 19.08.2013  | 3              | 37.7           | 6.7     | 97.1              | 2.6                  | 23                                |
|            | R12         | Compass     | Rapool            | DE 053-323022   | 19.08.2013  | 3              | 8.96           | 6.7     | 24.3              | 2.7                  | 19                                |
|            | R13         | Compass     | Rapool            | DE 053-323022   | 20.08.2013  | 3              | 32.8           | 6.7     | 81.0              | 2.5                  | 19                                |
|            | R14         | PR 46 W20   | Pioneer           | DE 033-4620100W | 19.08.2013  | 4              | 69.6           | 4.1     | 112.9             | 1.6                  | 1                                 |
|            | R15         | PR 46 W20   | Pioneer           | DE 033-4620100W | 19.08.2013  | 4              | 15.5           | 4.1     | 26.1              | 1.7                  | 1                                 |
|            | R16         | Genie       | Rapool            | DE 053-323088   | 16.08.2013  | 3              | 65.3           | 7       | 162.4             | 2.5                  | 14                                |
|            | R17         | Genie       | Rapool            | DE 053-323088   | 16.08.2013  | 3              | 37.6           | 7       | 93.4              | 2.5                  | 27                                |
|            | R18         | Sherpa      | Rapool            | a               | 20.08.2013  | 3              | 12.9           | a       | a                 | a                    | b                                 |
|            | R19         | Sherpa      | Rapool            | a               | 20.08.2013  | 3              | 4.8            | a       | a                 | a                    | b                                 |

| Study Site | Study Field | OSR Variety       | Seed manufacturer | Batch number    | Sowing Date | Flowering Time | Plot Size (ha) | TSW (g) | Amount Sowed (kg) | Seed Density (kg/ha) | Clothianidin Loading (mg/kg seed) |
|------------|-------------|-------------------|-------------------|-----------------|-------------|----------------|----------------|---------|-------------------|----------------------|-----------------------------------|
| Test       | T1          | Compass           | Rapool            | DE 053-323003   | 29.08.2013  | 3              | 38.0           | 6.1     | 114.4             | 3.0                  | 6515                              |
|            |             | Sherpa            | Rapool            | DE 053-323307   | 29.08.2013  | 3              | 11.8           | 5.6     | 31.9              | 2.7                  | 4387                              |
|            | T2          | Xenon             | Rapool            | DE 013-1471531  | 15.08.2013  | 2              | 46.8           | 5.3     | 103.6             | 2.2                  | 8144                              |
|            | T3          | Xenon             | Rapool            | DE 013-1471531  | 14.08.2013  | 2              | 198            | 5.3     | 366.6             | 1.9                  | 8215                              |
|            | T4          | PR 46 W20         | Pioneer           | DE 033-4620008W | 21.08.2013  | 4              | 15.5           | 6.6     | 39.6              | 2.6                  | 8808                              |
|            | T5          | PR 46 W20         | Pioneer           | DE 033-4620008W | 20.08.2013  | 4              | 10.5           | 6.6     | 26.4              | 2.5                  | 7651                              |
|            | T6          | PR 46 W20         | Pioneer           | DE 033-4620008W | 20.08.2013  | 4              | 25.7           | 6.6     | 66.0              | 2.5                  | 8308                              |
|            | T7          | Sherpa            | Rapool            | DE 013-1471502  | 13.08.2013  | 3              | 64.8           | 6.3     | 195.7             | 3.0                  | 7448                              |
|            | T8          | PR 46 W20         | Pioneer           | DE 032-4621999W | 13.08.2013  | 4              | 61.5           | 4.4     | 124.3             | 2.0                  | 6980                              |
|            | T9          | Arsenal           | LG                | DE 063-1723151  | 24.08.2013  | 2              | 12.0           | 8.37    | 55.2              | 4.6                  | 8071                              |
|            |             | PR 46 W20 Batch 1 | Pioneer           | DE 032-462182W  | 24.08.2013  | 4              | 12.1           | 4.7     | 31.5              | 2.6                  | 8699                              |
|            |             | PR 46 W20 Batch 2 | Pioneer           | DE 032-4622005W | 24.08.2013  | 4              | 5.0            | 4.9     | 12.5              | 2.5                  | 8369                              |
| T10        | Mercedes    | Rapool            | DE 013-1471872    | 25.08.2013      | 4           | 4.5            | 5.4            | 22.5    | 5.0               | 5142                 |                                   |
|            | Alister     | Syngenta          | c                 | 25.08.2013      | 3           | 1.0            | 5.23           | 5       | 5.0               | 8648                 |                                   |
|            | Saveo       | Syngenta          | c                 | 25.08.2013      | 3           | 3.8            | 4.57           | 10      | 2.6               | 8855                 |                                   |
|            | Vesuvio     | Syngenta          | c                 | 25.08.2013      | 3           | 3.8            | 4.57           | 10      | 2.6               | 7940                 |                                   |
|            | Mix 1       | -                 | c                 | 25.08.2013      | 3           | 25.9           | 6.26           | 44.9    | 1.7               | 8000                 |                                   |
| T11        | Sherpa      | Rapool            | DE 013-1471500    | 22.08.2013      | 3           | 42.6           | 6.1            | 123.2   | 2.9               | 8107                 |                                   |
| T12        | Arabella    | LG                | DE 063-1723139    | 20.08.2013      | 2           | 12.5           | 8.34           | 70      | 5.6               | 7238                 |                                   |

| Study Site | Study Field | OSR Variety | Seed manufacturer | Batch number | Sowing Date | Flowering Time | Plot Size (ha) | TSW (g) | Amount Sowed (kg) | Seed Density (kg/ha) | Clothianidin Loading (mg/kg seed) |
|------------|-------------|-------------|-------------------|--------------|-------------|----------------|----------------|---------|-------------------|----------------------|-----------------------------------|
| Test       | T13         | Marquis     | SW                | c            | 16.08.2013  | 3              | 0.75           | 5.5     | 4                 | 5.3                  | 7236                              |
|            |             | Mascara     | SW                | c            | 16.08.2013  | 4              | 0.78           | 5.9     | 4                 | 5.2                  | 8539                              |
|            |             | PX 104      | Pioneer           | c            | 16.08.2013  | 3              | 0.80           | 6.3     | 4                 | 5.1                  | 7111                              |
|            |             | Arabella    | LG                | c            | 16.08.2013  | 2              | 0.79           | 5.97    | 4                 | 5.1                  | 8927                              |
|            |             | PX109       | Pioneer           | c            | 16.08.2013  | 3              | 0.80           | 7       | 4                 | 5.0                  | 8554                              |
|            |             | Arsenal     | LG                | c            | 16.08.2013  | 2              | 0.81           | 7.45    | 4                 | 4.9                  | 7533                              |
|            |             | Anisse      | Euralis           | c            | 16.08.2013  | 2              | 0.82           | 7.7     | 4                 | 4.9                  | 2958 <sup>d</sup>                 |
|            |             | Trinity     | SW                | c            | 16.08.2013  | 3              | 0.83           | 5.3     | 3                 | 3.6                  | 10824                             |
|            |             | Patron      | Bayer             | c            | 16.08.2013  | 3              | 0.84           | 4.5     | 3                 | 3.6                  | 8007                              |
|            |             | Sherlock    | KWS               | c            | 16.08.2013  | 2              | 0.85           | 4.2     | 3                 | 3.5                  | 8880                              |
|            |             | Raptor      | KWS               | c            | 16.08.2013  | 2              | 0.87           | 4.05    | 3                 | 3.5                  | 7855                              |
|            |             | ES Alegrie  | Euralis           | c            | 16.08.2013  | 2              | 0.88           | 4.5     | 3                 | 3.4                  | 2959 <sup>d</sup>                 |
|            |             | Letitia     | Bayer             | c            | 16.08.2013  | 3              | 0.89           | 4.5     | 3                 | 3.4                  | 7805                              |
|            |             | Marathon    | Rapool            | c            | 16.08.2013  | 2              | 0.90           | 4.85    | 3                 | 3.3                  | 8611                              |
|            |             | Genie       | Rapool            | c            | 16.08.2013  | 3              | 0.91           | 4.6     | 3                 | 3.3                  | 6561                              |
|            |             | Mercedes    | Rapool            | c            | 16.08.2013  | 4              | 0.92           | 5.4     | 3.7               | 4.0                  | 7767                              |
|            |             | Comfort     | Rapool            | c            | 16.08.2013  | 4              | 0.93           | 5.93    | 3.7               | 4.0                  | 8654                              |
|            |             | Midas       | Rapool            | c            | 16.08.2013  | 2              | 0.94           | 6.1     | 3.7               | 3.9                  | 9486                              |
|            |             | Sherpa      | Rapool            | c            | 16.08.2013  | 3              | 0.95           | 5.7     | 3.7               | 3.9                  | 10138                             |
|            |             | Foxx        | Rapool            | c            | 16.08.2013  | 3              | 0.96           | 6       | 3.7               | 3.8                  | 9492                              |
| Avatar     | Rapool      | c           | 16.08.2013        | 2            | 0.97        | 6.8            | 4.9            | 5.0     | 8914              |                      |                                   |
| Visby      | Rapool      | c           | 16.08.2013        | 2            | 0.98        | 8.8            | 4.9            | 5.0     | 8959              |                      |                                   |
| Mix 2      | -           | c           | 16.08.2013        | 3            | 14.4        | 5.37           | 43.5           | 3.0     | 6800              |                      |                                   |

| Study Site | Study Field | OSR Variety           | Seed manufacturer | Batch number   | Sowing Date | Flowering Time | Plot Size (ha) | TSW (g) | Amount Sowed (kg) | Seed Density (kg/ha) | Clothianidin Loading (mg/kg seed) |
|------------|-------------|-----------------------|-------------------|----------------|-------------|----------------|----------------|---------|-------------------|----------------------|-----------------------------------|
| Test       | T14         | Marathon (Elado+DMM)  | Rapool            | -              | 17.08.2013  | 2              | 12.0           | 4.85    | 25.8              | 2.2                  | 7844                              |
|            |             | Marathon (Elado+TMTD) | Rapool            | DE 053-323193  | 17.08.2013  | 2              | 12.5           | 7.2     | 28.0              | 2.2                  | 7871                              |
|            | T15         | Visby Batch 1         | Rapool            | DE 053-323326  | 22.08.2013  | 2              | 45.0           | 8.3     | 218.6             | 4.8                  | 6663                              |
|            |             | Visby Batch 2         | Rapool            | DE 053-323544  |             |                |                |         |                   |                      | 6265                              |
|            | T16         | Sherpa                | Rapool            | DE 012-147030  |             | 3              | 1.50           | 5.7     | 7.2               |                      | 9082                              |
|            | T17         | Adriana               | LG                | DE 033-0050003 | 16.08.2013  | 3              | 15.0           | 6.1     | 33.4              | 2.2                  | 7581                              |
|            | T18         | Avatar                | Rapool            | DE 053-323450  | 19.08.2013  | 2              | 55.4           | 6.2     | 178               | 3.2                  | 8148                              |
|            | T19         | Sherpa                | Rapool            | a              | 22.08.2013  | 3              | 37.8           | a       | a                 | a                    | b                                 |
|            | T20         | Visby                 | Rapool            | a              | 22.08.2013  | 2              | 67.6           | a       | a                 | a                    | b                                 |
|            | T21         | Sherpa                | Rapool            | a              | 24.08.2013  | 3              | 35.6           | a       | a                 | a                    | b                                 |
|            | T22         | Dimension             | Rapool            | a              | 24.08.2013  | 2              | 33.3           | a       | a                 | a                    | b                                 |
|            | T23         | Visby                 | Rapool            | a              | 15.08.2013  | 2              | 96.7           | a       | a                 | a                    | b                                 |
|            | T24         | Arabella              | LG                | a              | 20.08.2013  | 2              | 16.1           | a       | a                 | a                    | b                                 |
|            | T25         | Adriana               | LG                | a              | 19.08.2013  | 3              | 45.3           | a       | a                 | a                    | b                                 |
|            | T26         | Compass               | Rapool            | a              | 24.08.2013  | 3              | 4.47           | a       | a                 | a                    | b                                 |
|            | T27         | Sherpa                | Rapool            | a              | 28.08.2013  | 3              | 9.56           | a       | a                 | a                    | b                                 |
|            |             |                       | Sherpa            | Rapool         | a           | 28.08.2013     | 3              | 9.13    | a                 | a                    | a                                 |
